# Supplementary material
Source: PubMed Central journal article supplement (PMC7075491)
Supplement: NIHMS1561901-supplement-1.pdf [file NIHMS1561901-supplement-1.pdf]

**Appendix Table 1.** Codes used to define cohort and outcomes.

| <b>Codes used to define cohort and outcomes</b> |                                                                                                                                                                                                                                    |
|-------------------------------------------------|------------------------------------------------------------------------------------------------------------------------------------------------------------------------------------------------------------------------------------|
| ED visits                                       | Current Procedural Terminology (CPT): 99281, 99282, 99283, 99284, 99285<br><br>Healthcare Common Procedure Coding System: G0380, G0381, G0382, G0383, G0384, B0001<br><br>Revenue Center Codes: 0450, 0451, 0452, 0456, 0459, 0981 |
| UTUS                                            | International Classification of Diseases, Ninth Edition (ICD-9-CM) codes: 274.11, 592.0, 592.1, 592.2                                                                                                                              |
| CT scan of the pelvis and/or abdomen            | ICD-9-CM: 72192, 72193, 72194, 74150, 74160, 74170, 74176, 74177, 74178                                                                                                                                                            |
| RUS                                             | CPT: 76700, 76705, 76770, 76775                                                                                                                                                                                                    |
| AXR                                             | CPT: 74000, 74020                                                                                                                                                                                                                  |

**Appendix 1.**

We performed risk-standardization using a previously described methodology:

$$\text{Risk-standardized rate} = (\text{Quarterly observed rate}/\text{Expected rate}) * \text{Reference rate}^{16}$$

Creating a separate model for children and adults, we calculated the expected number of CT scans per quarter through a multivariable logistic regression model adjusting for those factors which could impact whether a CT was performed (U.S. census division, race, sex, and quarter). The observed number of CTs per quarter was divided by this calculated expected number, which

was then multiplied by the CT scan rate for all children and adults in this cohort for the entire analysis period, respectively, to determine the risk-standardized rate of CT utilization per quarter for children and adults.

**Appendix Table 2.** Outcome of the logistic regression used to calculate expected rates for children and adults.

| <b>Children - Logistic</b> |                 |               |                   |                              |      |                |
|----------------------------|-----------------|---------------|-------------------|------------------------------|------|----------------|
|                            | <b>Estimate</b> | <b>StdErr</b> | <b>Odds Ratio</b> | <b>95% Confidence Limits</b> |      | <b>P-Value</b> |
| <b>Intercept</b>           | -2.69           | 0.08          | --                | --                           | --   |                |
| <b>Age Diagnosis</b>       | 0.17            | 0.00          | 1.19              | 1.18                         | 1.20 | <.0001         |
| <b>Female</b>              | 0.22            | 0.03          | 1.24              | 1.16                         | 1.33 | <.0001         |
| <b>Race</b>                |                 |               |                   |                              |      |                |
| <i>Black</i>               | -0.09           | 0.07          | 0.91              | 0.80                         | 1.04 |                |
| <i>Hispanic</i>            | -0.28           | 0.06          | 0.75              | 0.67                         | 0.85 | <.0001         |
| <i>Asian</i>               | -0.40           | 0.14          | 0.67              | 0.51                         | 0.87 |                |
| <i>White</i>               |                 |               | <i>Ref</i>        |                              |      |                |
| <b>Division</b>            |                 |               |                   |                              |      |                |
| <i>East South Central</i>  | 0.40            | 0.08          | 1.49              | 1.29                         | 1.74 |                |
| <i>Middle Atlantic</i>     | -0.47           | 0.08          | 0.62              | 0.53                         | 0.73 |                |
| <i>Mountain</i>            | 0.31            | 0.07          | 1.37              | 1.19                         | 1.58 |                |
| <i>New England</i>         | -0.48           | 0.10          | 0.62              | 0.51                         | 0.76 |                |
| <i>Pacific</i>             | -0.41           | 0.09          | 0.67              | 0.56                         | 0.79 | <.0001         |
| <i>South Atlantic</i>      | 0.29            | 0.05          | 1.33              | 1.21                         | 1.47 |                |
| <i>West North Central</i>  | 0.33            | 0.07          | 1.39              | 1.23                         | 1.58 |                |
| <i>West South Central</i>  | 0.26            | 0.06          | 1.30              | 1.17                         | 1.45 |                |
| <i>East North Central</i>  |                 |               | <i>Ref</i>        |                              |      |                |
| <b>Elixhauser</b>          | -0.11           | 0.02          | 0.90              | 0.87                         | 0.94 | <.0001         |
| <b>Quarter</b>             | 0.00            | 0.00          | 1.00              | 1.00                         | 1.00 | 0.0765         |
| <b>Adults - Logistic</b>   |                 |               |                   |                              |      |                |
|                            | <b>Estimate</b> | <b>StdErr</b> | <b>Odds Ratio</b> | <b>95% Confidence Limits</b> |      | <b>P-Value</b> |
| <b>Intercept</b>           | 0.76            | 0.01          | --                | --                           | --   |                |
| <b>Age Diagnosis</b>       | -0.01           | 0.00          | 0.99              | 0.99                         | 0.99 | <.0001         |
| <b>Female</b>              | 0.04            | 0.00          | 1.04              | 1.03                         | 1.05 | <.0001         |

|                           |       |      |            |      |      |        |
|---------------------------|-------|------|------------|------|------|--------|
| <b>Race</b>               |       |      |            |      |      |        |
| <i>Black</i>              | 0.02  | 0.01 | 1.02       | 1.01 | 1.03 |        |
| <i>Hispanic</i>           | -0.10 | 0.01 | 0.91       | 0.90 | 0.92 | <.0001 |
| <i>Asian</i>              | -0.26 | 0.01 | 0.77       | 0.75 | 0.79 |        |
| <i>White</i>              |       |      | <i>Ref</i> |      |      |        |
| <b>Division</b>           |       |      |            |      |      |        |
| <i>East South Central</i> | 0.08  | 0.01 | 1.08       | 1.06 | 1.10 |        |
| <i>Middle Atlantic</i>    | -0.52 | 0.01 | 0.60       | 0.59 | 0.60 |        |
| <i>Mountain</i>           | -0.07 | 0.01 | 0.93       | 0.92 | 0.94 |        |
| <i>New England</i>        | -0.37 | 0.01 | 0.69       | 0.68 | 0.70 |        |
| <i>Pacific</i>            | -0.48 | 0.01 | 0.62       | 0.61 | 0.63 | <.0001 |
| <i>South Atlantic</i>     | -0.19 | 0.01 | 0.83       | 0.82 | 0.84 |        |
| <i>West North Central</i> | 0.12  | 0.01 | 1.12       | 1.11 | 1.14 |        |
| <i>West South Central</i> | -0.09 | 0.01 | 0.92       | 0.91 | 0.93 |        |
| <i>East North Central</i> |       |      | <i>Ref</i> |      |      |        |
| <b>Elixhauser</b>         | 0.04  | 0.00 | 1.04       | 1.04 | 1.04 | <.0001 |
| <b>Quarter</b>            | 0.01  | 0.00 | 1.01       | 1.01 | 1.01 | <.0001 |

## Appendix 2.

The standard multiple group interrupted time series analysis regression model used in this analysis is given below:<sup>18,19</sup>

$$Y_t = \beta_0 + \beta_1 T_t + \beta_2 X_t + \beta_3 X_t T_t + \beta_4 Z + \beta_5 Z T_t + \beta_6 Z X_t + \beta_7 Z X_t T_t + \epsilon_t \quad (1)$$

$Y_t$  is the aggregated outcome variable measured at each quarter  $t$ ,  $T_t$  is the time since the start of the Image Gently Campaign for children,  $X_t$  is the indicator variable of the intervention (the campaign),  $Z$  is the dummy variable for the study cohort treatment (children) or control (adults).

$X_tT_t$  is the interaction term for adults. The interaction terms for the children are  $ZT_t$ ,  $ZX_t$ , &  $ZX_tT_t$ . The random error term is  $\epsilon_t$ .

$\beta_0$  represents the intercept or starting value of the outcome for control,  $\beta_1$  is the pre-intervention trend of the control,  $\beta_2$  provides the change in the level of outcome for control group that occurs at the quarter immediately after the initiation of the Image Gently Campaign,  $\beta_4$  represents the difference in the starting value of the outcome between children and adults,  $\beta_5$  represents the difference in the trend between children and adults in the pre-intervention period,  $\beta_6$  is the difference in the level between children and adults in the post intervention period (immediately following the launch of the campaign);  $\beta_7$  represents difference between adults and children in the slope after initiation of the campaign compared with pre-campaign.

**Appendix Table 3.** Examples of the sensitivity analysis truncating the data at various time points including a) 8/1/2004-7/31/2015 (truncating the beginning time point), b) 8/1/2002-7/31/2014 (truncating the ending time point), and c) 8/1/2004-7/31/2013 (truncating the beginning and ending time point).

a)

| CT-Rate           | Pre-intervention Slope | Post-Intervention Slope | Intervention Differences | Lower Bound 95% CI | Upper Bound 95% CI | p-value |
|-------------------|------------------------|-------------------------|--------------------------|--------------------|--------------------|---------|
| <b>Children</b>   | 2.928                  | -2.009                  | -4.937                   | -9.692             | -0.183             | 0.042   |
| <b>Adult</b>      | 4.838                  | -2.816                  | -7.654                   | -10.072            | -5.236             | <0.001  |
| <b>Difference</b> | -1.910                 | 0.806                   | 2.717                    | -2.618             | 8.051              | 0.317   |

b)

| UTUS CT-Rate      | Pre-intervention Slope | Post-Intervention Slope | Intervention Differences | Lower Bound 95% CI | Upper Bound 95% CI | p-value |
|-------------------|------------------------|-------------------------|--------------------------|--------------------|--------------------|---------|
| <b>Children</b>   | 5.069                  | -2.162                  | -7.232                   | -10.109            | -4.354             | <0.001  |
| <b>Adult</b>      | 7.219                  | -2.961                  | -10.179                  | -11.711            | -8.648             | <0.001  |
| <b>Difference</b> | -2.149                 | 0.798                   | 2.948                    | -0.312             | 6.207              | 0.076   |

c)

| UTUS CT-Rate      | Pre-intervention Slope | Post-Intervention Slope | Intervention Differences | Lower Bound 95% CI | Upper Bound 95% CI | p-value |
|-------------------|------------------------|-------------------------|--------------------------|--------------------|--------------------|---------|
| <b>Children</b>   | 2.928                  | -2.983                  | -5.911                   | -10.786            | -1.037             | 0.018   |
| <b>Adult</b>      | 4.838                  | -2.994                  | -7.832                   | -10.323            | -5.341             | <0.001  |
| <b>Difference</b> | -1.910                 | 0.010                   | 1.921                    | -3.553             | 7.394              | 0.486   |

**Appendix Figure 1.** Examples of the sensitivity analysis truncating the data at various time points including a) 8/1/2004-7/31/2015 (truncating the beginning time point), b) 8/1/2002-7/31/2014 (truncating the ending time point), and c) 8/1/2004-7/31/2013 (truncating the beginning and ending time point).

a)

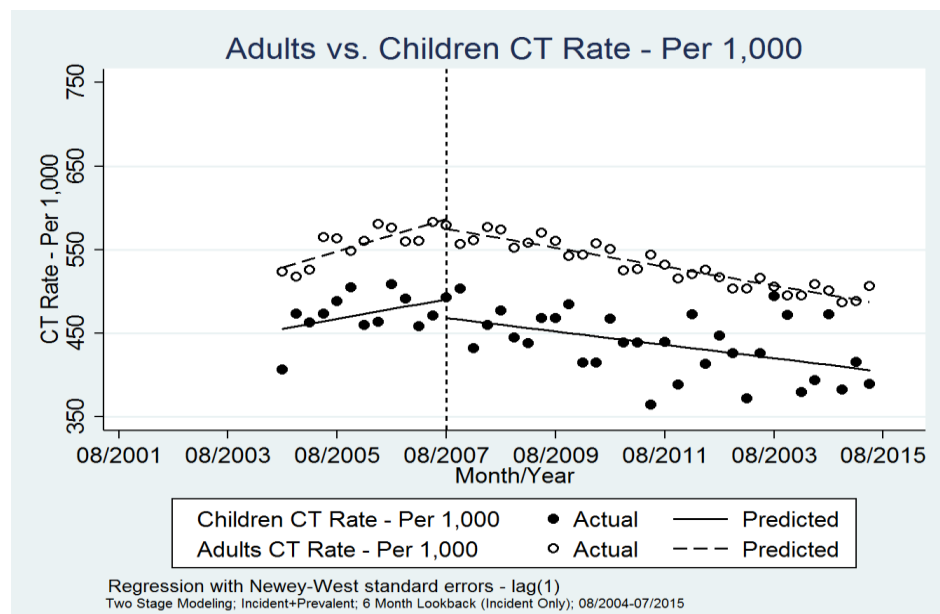

b)

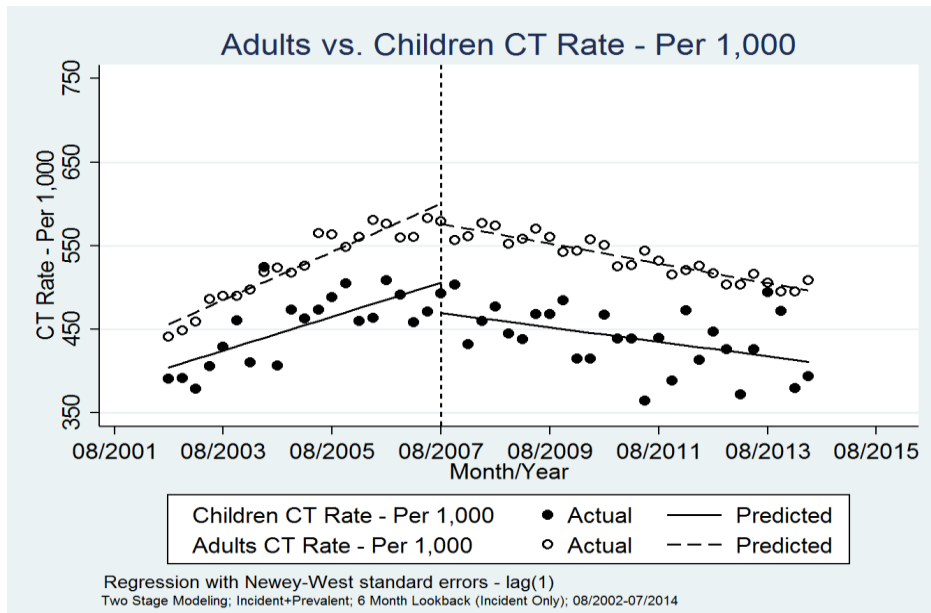

c)

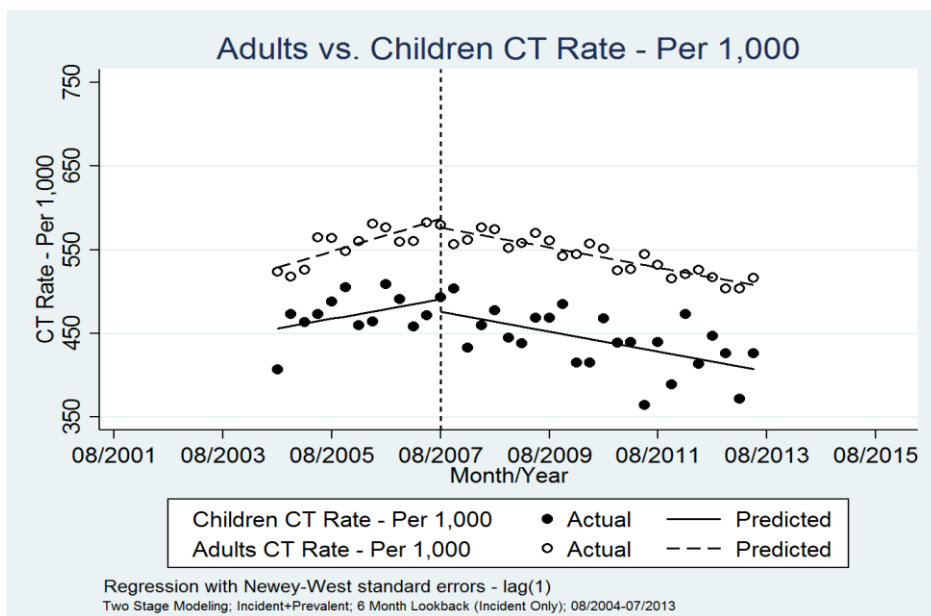

**Appendix Table 4.** Combination of imaging modalities used during each stone episode (unadjusted).

| Date Range      | Children                               |                |                           | Adults                     |                |                           |
|-----------------|----------------------------------------|----------------|---------------------------|----------------------------|----------------|---------------------------|
|                 | <i>Other<sup>d</sup> or No Imaging</i> | <i>CT Only</i> | <i>CT + Other Imaging</i> | <i>Other or No Imaging</i> | <i>CT Only</i> | <i>CT + Other Imaging</i> |
| 08/2007-07/2008 | 44.3%                                  | 28.2%          | 27.5%                     | 33.5%                      | 39.3%          | 27.1%                     |

|                        |       |       |       |  |       |       |       |
|------------------------|-------|-------|-------|--|-------|-------|-------|
| <i>08/2008-07/2009</i> | 45.1% | 28.3% | 26.7% |  | 32.4% | 40.6% | 26.9% |
| <i>08/2009-07/2010</i> | 44.4% | 31.1% | 24.5% |  | 32.0% | 40.8% | 27.2% |
| <i>08/2010-07/2011</i> | 46.9% | 27.2% | 25.8% |  | 32.3% | 41.0% | 26.7% |
| <i>08/2011-07/2012</i> | 48.1% | 27.0% | 24.9% |  | 32.9% | 41.1% | 26.0% |
| <i>08/2012-07/2013</i> | 46.0% | 26.2% | 27.8% |  | 34.2% | 41.1% | 24.7% |
| <i>08/2013-07/2014</i> | 45.0% | 28.7% | 26.3% |  | 34.3% | 41.1% | 24.6% |
| <i>08/2014-07/2015</i> | 48.8% | 26.2% | 25.0% |  | 34.2% | 41.6% | 24.2% |

a. Other imaging includes RUS or AXR.
